# Supplementary material
Source: Springer Nature journal article supplement (https://www.springermedizin.de/resource/supplementary/12960_2009_185_MOESM1_ESM.pdf/9570604)

1) Preparatory activities

- National workshop
- Preparation of Data collection tools
- Preparation of audit meeting guidelines
- Training of the core audit teams

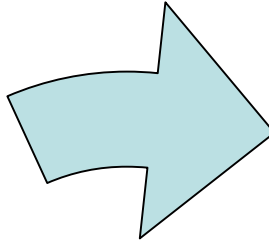

2) Identification of maternal death cases

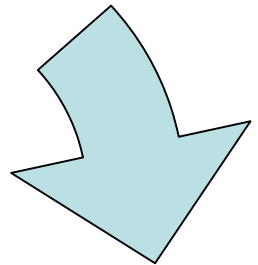

3) Data collection for each case

- Data collection at the facility
- Data collection in the community

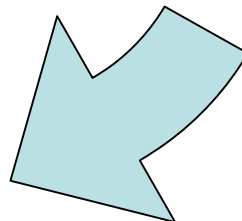

4) Conducting an audit session

- Data analysis
- Interpretation of findings
- Drawing conclusions

6) Implementation of the action plan and Evaluation

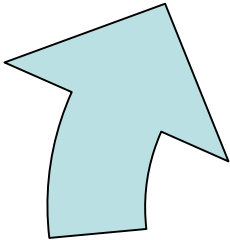

5) Utilizing the findings

- Making recommendation
- Preparation of an action plan

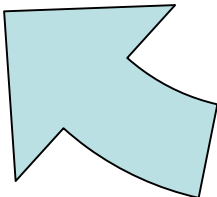

Supplement: MOESM1 [file 9570604]
